# Supplementary material for: View from the Top: Insights into the Diversity and Community Assembly of Ectomycorrhizal and Saprotrophic Fungi along an Altitudinal Gradient in Chinese Boreal Larix gmelinii-Dominated Forests
Source: MDPI journal article supplement (doi:10.3390/microorganisms10101997), 2022-10-10
Supplement: s1 [file s1]

Supplementary Materials:

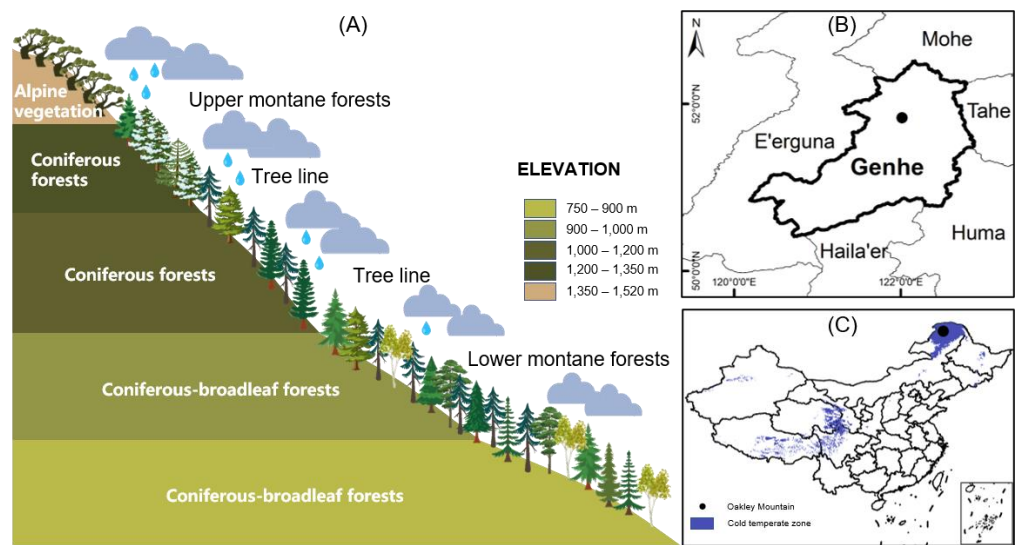

**Supplementary Figure S1.** Location of the study area (B) and Oakley Mountain (C) in China. Figure A indicates schematic view of the studied transects stretching across the *L. gmelinii*-dominated forests treelines.

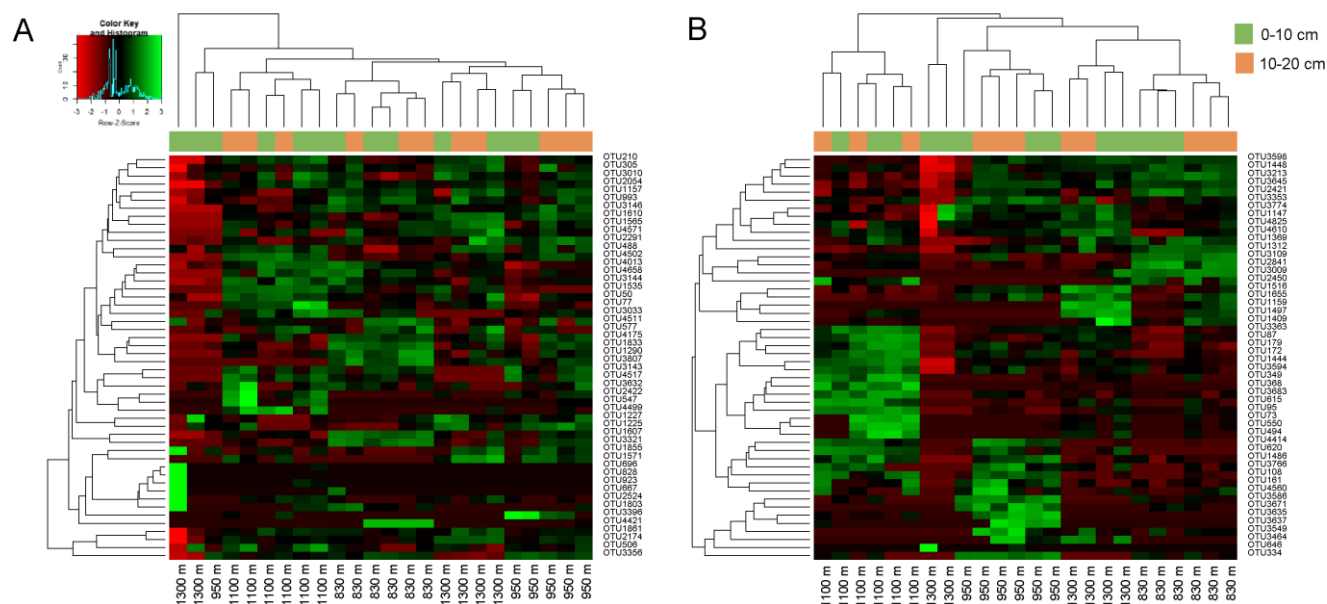

**Supplementary Figure S2** Heat map analyses of EcM (A) and SAP (B) fungal communities across all soil samples. Colors derived from the raw Z-scores were used to identify the relative abundances of the top 50 most abundant classified EcM and SAP fungal OTUs in each sample. Using the average clustering method and Euclidean distances, all samples were grouped in a hierarchical clustering.

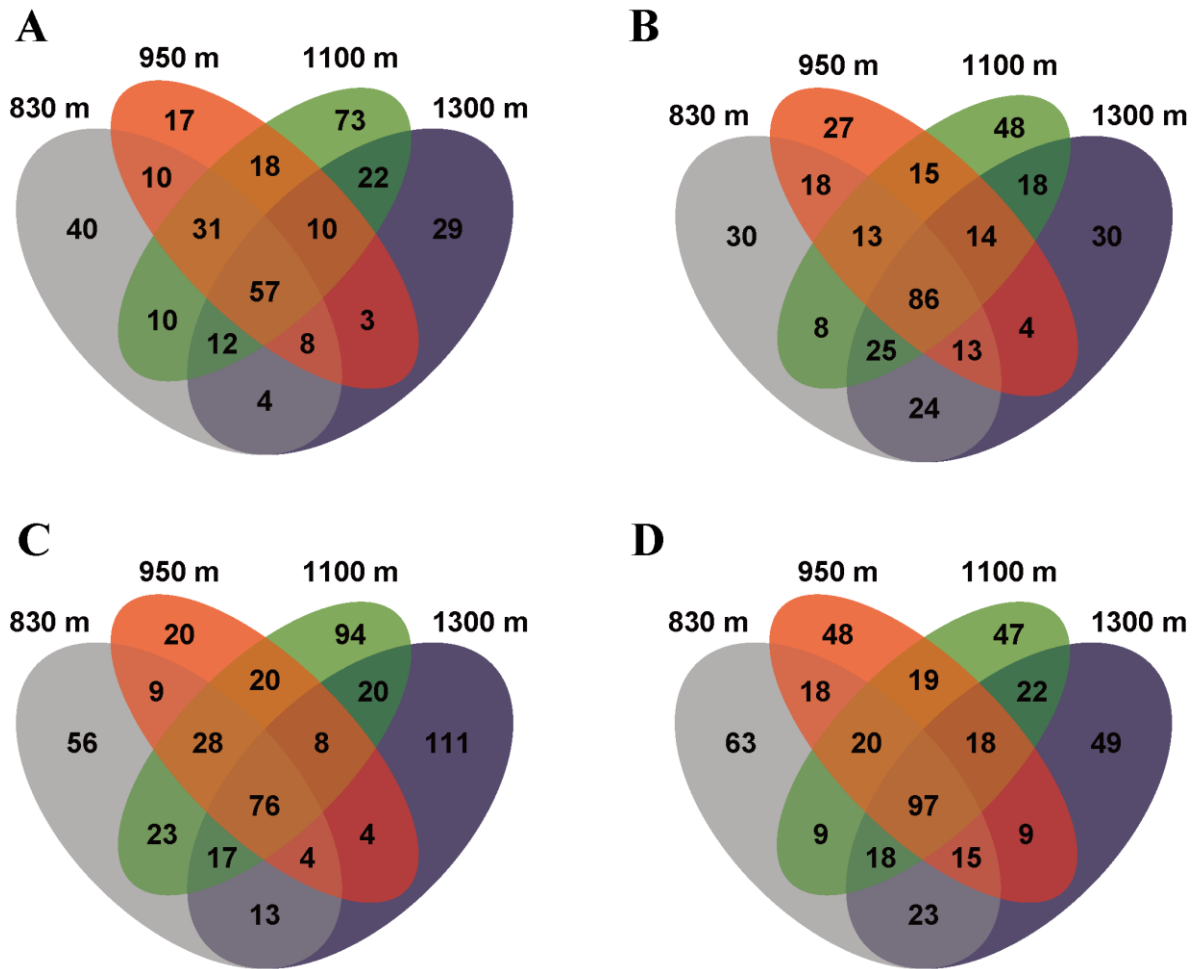

**Supplementary Figure S3.** Venn diagram of the number of shared and unique OTUs for EcM (A, B) and SAP fungal community (C, D) under the different altitudes and soil depths. (A, C), 0-10 cm; (B, D), 10-20 cm. OTUs defined at 97% sequence similarity.

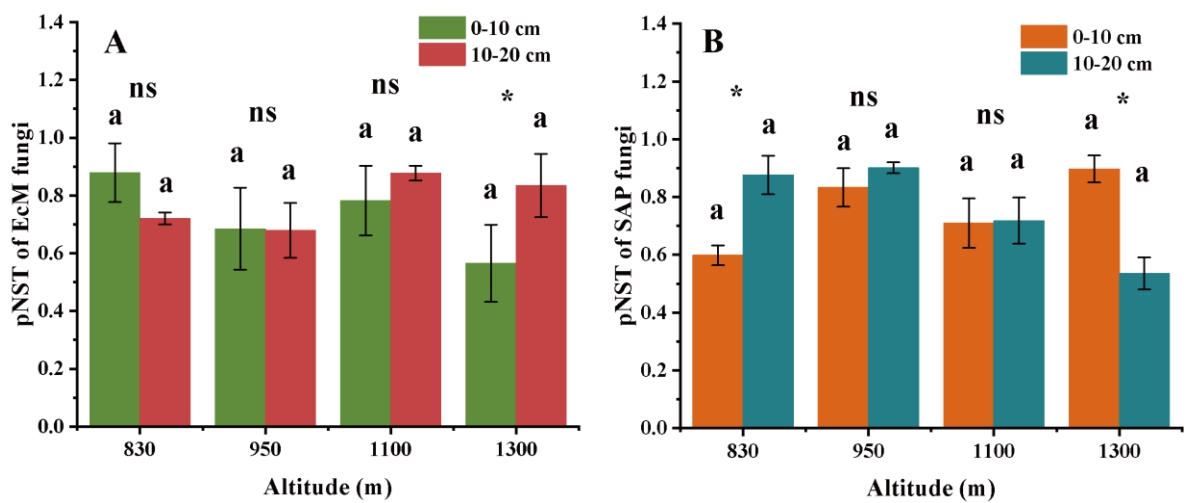

**Supplementary Figure S4** The ecological stochasticity in the potential EcM (A) and SAP (B) fungal communities' assembly is estimated by the phylogenetic normalized stochasticity ratio (pNST). The value < 0.5 and > 0.5 represent the deterministic and stochastic assembly, respectively.

The value of 0.5 is the boundary point between more deterministic (<0.5) and more stochastic (>0.5) assembly. Different lowercase letters indicate significant differences at different altitudes ( $P<0.05$ ). Differences among different altitudes were examined using Tukey's HSD test. Differences between the 0-10 cm and 10-20 cm soil layer were examined using a Student's *T*-test. \*,  $P<0.05$ ; ns, not significant.

**Supplementary Table S1.** The soil physicochemical property for surface and subsurface soils in different altitudes

| Soil variables                                         | 830 m              |                    | 950 m              |                    | 1100 m              |                     | 1300 m             |                     | Two-way ANOVA |       |       |
|--------------------------------------------------------|--------------------|--------------------|--------------------|--------------------|---------------------|---------------------|--------------------|---------------------|---------------|-------|-------|
|                                                        | Surface soil       | Subsurf ace soil   | Surface soil       | Subsurf ace soil   | Surface soil        | Subsurfa ce soil    | Surface soil       | Subsurfa ce soil    | Altitude      | Depth | A × D |
| BD (g·cm <sup>-3</sup> )                               | 0.89±0.1<br>3Aa    | 1.18±0.1<br>6Aa    | 0.63±0.1<br>0ABa   | 0.81±0.0<br>8Ba    | 0.58±0.13<br>ABa    | 0.64±0.04<br>Ba     | 0.34±0.02<br>Ba    | 0.45±0.04<br>Ba     | ***           | ns    | ns    |
| Soil moisture (%)                                      | 30.75±3.<br>48Ca   | 20.34±1.<br>31Cb   | 37.48±1.<br>75BCa  | 30.7±3.4<br>1BCb   | 47.14±3.8<br>5Ba    | 41.71±5.8<br>9Bb    | 71.01±3.9<br>6Aa   | 58.32±3.5<br>5Ab    | ***           | **    | ns    |
| ST (°C)                                                | 11.12±0.<br>17Aa   | 7.00±0.5<br>8Bb    | 10.41±0.<br>19ABa  | 9.02±0.2<br>9Ab    | 10.25±0.3<br>5ABa   | 9.48±0.84<br>Ab     | 9.01±0.87<br>Ba    | 9.23±0.28<br>Ab     | *             | *     | ns    |
| SOC (mg·g <sup>-1</sup> )                              | 61.28±2.<br>65Aa   | 62.08±3.<br>75Aa   | 65.62±3.<br>26Aa   | 62.03±0.<br>23Ba   | 63.14±1.4<br>5Aa    | 61.22±1.9<br>1Ba    | 61.67±2.5<br>4Aa   | 63.83±2.6<br>2Aa    | ns            | ns    | ns    |
| TN (mg·g <sup>-1</sup> )                               | 7.02±0.1<br>8Aa    | 6.87±0.3<br>2Aa    | 6.64±0.3<br>0Aa    | 6.97±0.0<br>1Aa    | 6.88±0.15<br>Aa     | 7.06±0.12<br>Aa     | 6.97±0.17<br>Aa    | 6.75±0.20<br>Aa     | ns            | ns    | ns    |
| TP (mg·g <sup>-1</sup> )                               | 0.48±0.0<br>5Aa    | 0.56±0.0<br>3Aa    | 0.19±0.0<br>3Ba    | 0.62±0.0<br>4Aa    | 0.44±0.14<br>Aa     | 0.34±0.07<br>Aa     | 0.52±0.17<br>Aa    | 1.59±0.17<br>Aa     | *             | ns    | ns    |
| pH                                                     | 4.55±0.0<br>2Aa    | 4.74±0.3<br>6Aa    | 4.31±0.0<br>2ABa   | 4.21±0.1<br>8Aa    | 4.23±0.04<br>ABa    | 4.28±0.06<br>Aa     | 4.01±0.45<br>Ba    | 4.23±0.07<br>Aa     | *             | ns    | ns    |
| NO <sub>3</sub> <sup>-</sup> -N (mg·kg <sup>-1</sup> ) | 5.39±0.0<br>8Ba    | 5.35±0.2<br>5Ba    | 5.92±0.1<br>8Ba    | 5.62±0.0<br>4Ba    | 5.57±0.09<br>Ba     | 5.39±0.24<br>Ba     | 6.97±0.32<br>Aa    | 6.43±0.31<br>Aa     | ***           | ns    | ns    |
| NH <sub>4</sub> <sup>+</sup> -N (mg·kg <sup>-1</sup> ) | 63.25±5.<br>23Ba   | 63.34±5.<br>25Ba   | 61.27±2.<br>32Ba   | 58.59±0.<br>53Ba   | 94.68±4.3<br>5Aa    | 87.72±2.4<br>4Aa    | 88.09±14.<br>84ABa | 82.02±3.8<br>8Aa    | ***           | ns    | ns    |
| DOC (mg·kg <sup>-1</sup> )                             | 163.33±7<br>.96Ba  | 148.13±4<br>.80Ba  | 269.60±1<br>7.07Aa | 295.87±9<br>.12Aa  | 291.47±7.<br>54Aa   | 262.80±1<br>1.31Aa  | 213.07±4.<br>92Aa  | 233.33±12<br>.41ABa | ns            | ns    | ns    |
| DON (mg·kg <sup>-1</sup> )                             | 15.92±2.<br>31Ba   | 11.48±1.<br>75Ba   | 17.57±1.<br>61Ba   | 15.34±1.<br>22Ba   | 33.33±2.5<br>9Aa    | 36.57±2.1<br>2Aa    | 32.61±6.7<br>4Aa   | 33.73±1.8<br>5Aa    | ***           | ns    | ns    |
| MBC (mg·kg <sup>-1</sup> )                             | 456.84±2<br>6.86Ba | 307.02±1<br>1.88Bb | 602.81±5<br>9.38Ba | 538.95±4<br>5.01Ba | 1565.96±<br>98.72Aa | 1515.79±<br>24.21Aa | 785.26±5<br>4.04Ba | 885.26±75<br>.11ABa | *             | ns    | ns    |
| MBN (mg·kg <sup>-1</sup> )                             | 16.05±1.<br>36Ba   | 10.11±1.<br>79Ba   | 60.13±5.<br>40Aa   | 34.69±1.<br>89Ab   | 37.78±1.8<br>6Ba    | 36.23±1.1<br>5Aa    | 34.29±1.1<br>5Ba   | 34.59±1.5<br>3Aa    | *             | ns    | ns    |
| MBP (mg·kg <sup>-1</sup> )                             | 3.02±0.2<br>0Aa    | 2.82±0.1<br>3Aa    | 2.55±0.2<br>1Aa    | 2.21±0.1<br>5ABa   | 1.31±0.14<br>Ba     | 1.57±0.18<br>Ba     | 1.63±0.11<br>Ba    | 1.41±0.10<br>Ba     | *             | ns    | ns    |

A: Altitude; D: Soil depth. BD, Bulk density; ST, Soil temperature; SOC, Soil organic carbon; TN, Total nitrogen; NO<sub>3</sub><sup>-</sup>-N, Nitrate nitrogen; NH<sub>4</sub><sup>+</sup>-N, Ammonium nitrogen; DOC, Dissolved organic carbon; DON, Dissolved organic nitrogen; MBC, Microbial

biomass carbon; MBN. Microbial biomass nitrogen. Data with different uppercase letters were significantly difference at 5% level among different altitudes in the same soil layer ( $P<0.05$ ), while different lowercase letters indicate significant differences among different soil layers in the same altitude ( $P<0.05$ ); ns, not significant; \*,  $P<0.05$ ; \*\*,  $P<0.01$ ; \*\*\* $<0.001$  All data were mean  $\pm$  standard error (Mean  $\pm$  SE).
